# Supplementary material for: Hemoglobin-loaded ZIF-8 nanoparticles functionalized with human serum albumin as stealth, stable, and biocompatible oxygen carriers
Source: Royal Society of Chemistry journal article supplement (doi:10.1039/d5na00677e), 2025-01-01
Supplement: d5na00677e1.pdf [file d5na00677e1.pdf]

## Supporting Information

# Hemoglobin-loaded ZIF-8 nanoparticles functionalized with human serum albumin as stealth, stable, and biocompatible oxygen carriers

Despoina Douka<sup>a,‡</sup>, Arnau Dieste-Izquierdo<sup>a, ‡</sup>, Clara Coll-Satue<sup>a</sup>, Eva Jakljevič<sup>a</sup>, Fernando Enrique Farfán-Esponda<sup>a</sup>, Ana María Pablo Sainz-Ezquerro<sup>a</sup>, Leticia Hosta-Rigau<sup>a,\*</sup>

### AUTHOR ADDRESS

<sup>a</sup>Department of Health Technology, Technical University of Denmark, 2800 Kongens Lyngby, Denmark

<sup>‡</sup> These authors contributed equally.

\*E-mail: [leri@dtu.dk](mailto:leri@dtu.dk)

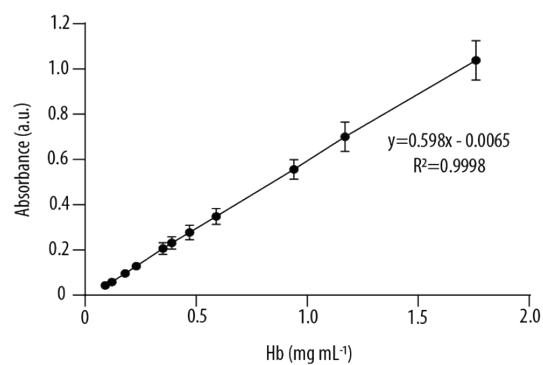

**Figure S1.** Standard curve for Hb stock, including the obtained linear formula and  $R^2$  value.

Dilution series for Hb were prepared and UV-Visible absorbance was measured at 413 nm and plotted against the Hb concentration.

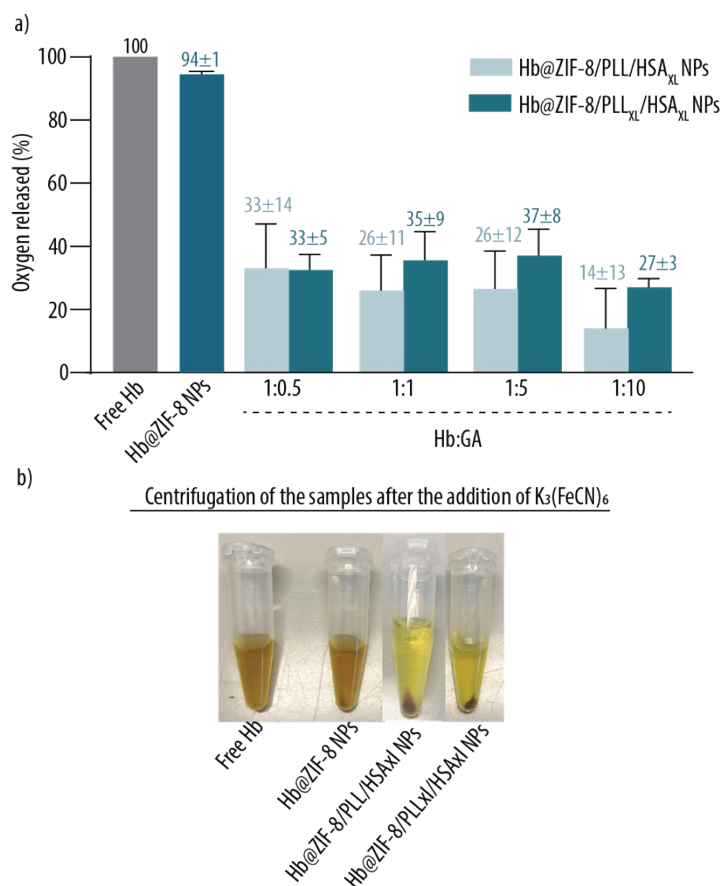

**Figure S2. a)** Oxygen released from free Hb, Hb-loaded ZIF-8 NPs (Hb@ZIF-8 NPs), and poly-L-lysine (PLL)- and human serum albumin (HSA)-coated Hb@ZIF-8 NPs crosslinked with glutaraldehyde (GA) at different Hb:GA molar ratios. The NPs are denoted as Hb@ZIF-8/PLL/HSA<sub>XL</sub> and Hb@ZIF-8/PLL<sub>XL</sub>/HSA<sub>XL</sub> NPs, where the subscript ‘XL’ indicates the crosslinking with GA. The data has been normalized to the oxygen released from free Hb at equivalent concentrations. **b)** Photographic images of free Hb, Hb@ZIF-8 NPs and Hb@ZIF-8/PLL<sub>XL</sub>/HSA<sub>XL</sub> NPs after the addition of  $K_3[Fe(CN)_6]$  reagent. As seen by the pellet formed after centrifugation, Hb@ZIF-8/PLL/HSA<sub>XL</sub> and Hb@ZIF-8/PLL<sub>XL</sub>/HSA<sub>XL</sub> NPs remain intact upon  $K_3[Fe(CN)_6]$  addition, unlike free Hb and Hb@ZIF-8 NPs, which disassemble and rapidly convert to metHb. This indicates that direct comparison of oxygen release between free Hb, Hb@ZIF-8 NPs and Hb@ZIF-8/PLL/HSA<sub>XL</sub> or Hb@ZIF-8/PLL<sub>XL</sub>/HSA<sub>XL</sub> NPs can be misleading.

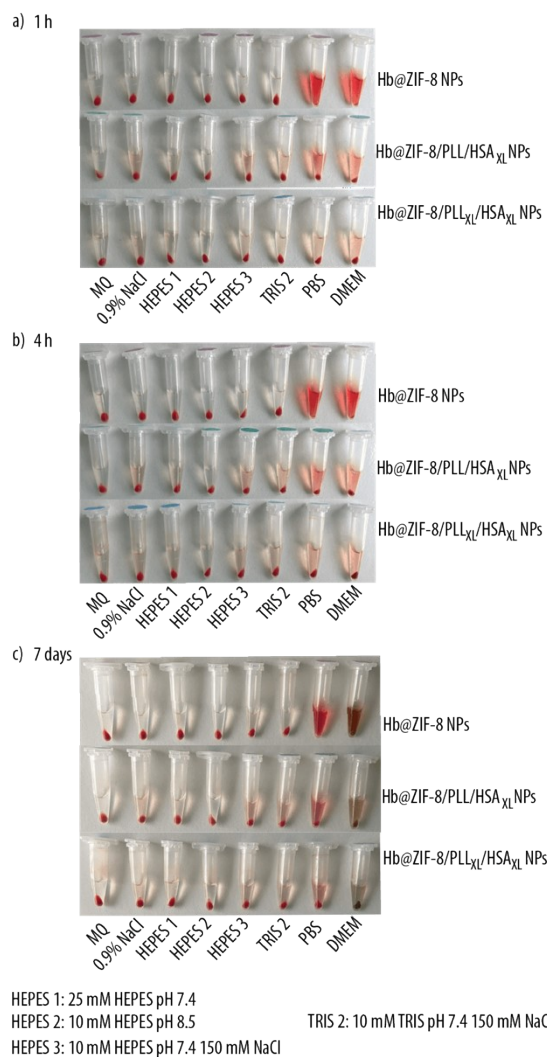

**Figure S3.** Photographic images of Hb-loaded ZIF-8 NPs (Hb@ZIF-8 NPs), and poly-*L*-lysine (PLL)- and human serum albumin (HSA)-coated Hb@ZIF-8 NPs incubated in Mili-Q water (MQ), saline (0.9% NaCl), 4-(2-hydroxyethyl)piperazine-1-ethane-sulfonic acid (HEPES), tris(hydroxymethyl)aminomethane (TRIS), phosphate buffered saline (PBS) and Dulbecco's Modified Eagle Medium (DMEM) for a) 1 h, b) 4 h and c) 7 days. The NPs are denoted as Hb@ZIF-8/PLL/HSA<sub>XL</sub> and Hb@ZIF-8/PLL<sub>XL</sub>/HSA<sub>XL</sub> NPs, where the subscript 'XL' indicates the crosslinking with glutaraldehyde.

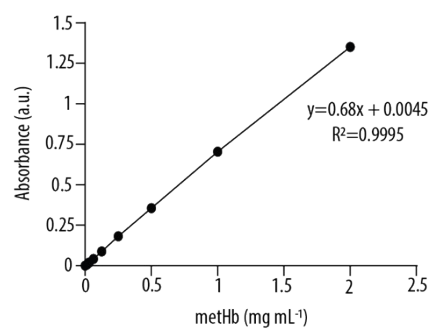

**Figure S4.** Standard curve for metHb, including the obtained linear formula and  $R^2$  value.

Dilution series for metHb were prepared and UV-Visible absorbance was measured at 404 nm and plotted against the metHb concentration.

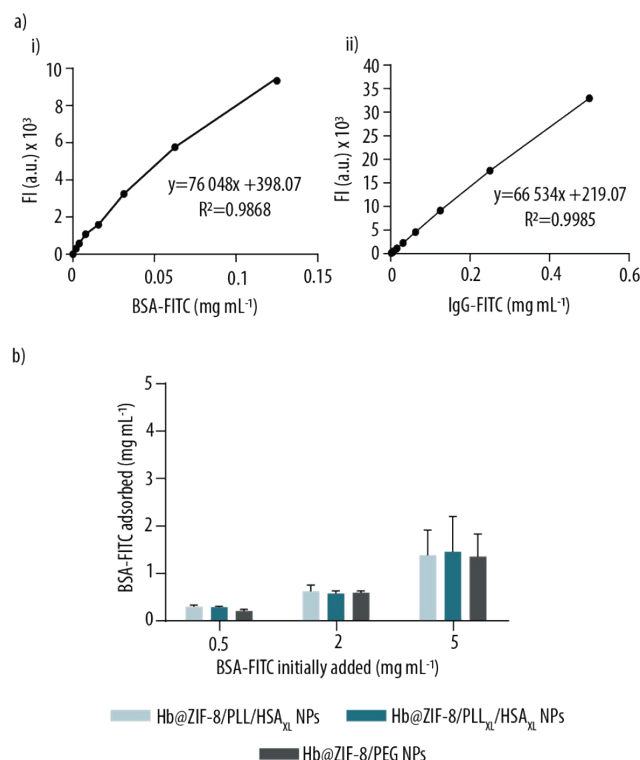

**Figure S5.** a) Standard curve for Fluorescein 5(6) – Isothiocyanate-labelled i) bovine serum albumin (BSA-FITC) and ii) Immunoglobulin G (IgG-FITC), including the obtained linear formula and  $R^2$  value. Dilution series for BSA-FITC and IgG-FITC were prepared, and fluorescence intensity (FI) was measured at an excitation wavelength of 493 nm and an emission wavelength of 516 nm and plotted against the BSA-FITC and IgG-FITC concentration, respectively. b) Concentration of BSA-FITC adsorbed onto 2 mg mL<sup>-1</sup> Hb-loaded ZIF-8 NPs (Hb@ZIF-8 NPs) coated with poly-*L*-lysine (PLL)- and human serum albumin (HSA) (i.e., Hb@ZIF-8/PLL/HSA<sub>XL</sub> and Hb@ZIF-8/PLL<sub>XL</sub>/HSA<sub>XL</sub> NPs), where the subscript ‘XL’ indicates the crosslinking with glutaraldehyde, and polyethylene glycol-coated Hb@ZIF-8 NPs (Hb@ZIF-8/PEG NPs). The NPs were prior incubated with increasing concentrations (i.e., 0.5, 2 and 5 mg mL<sup>-1</sup>) of BSA-FITC.

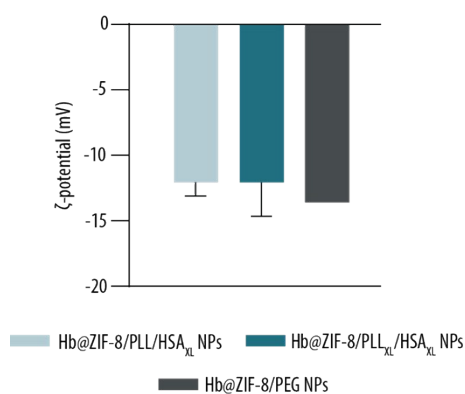

**Figure S6.** Zeta ( $\zeta$ )-potential measurements of Hb-loaded ZIF-8 NPs (Hb@ZIF-8 NPs) coated with poly-*L*-lysine (PLL)- and human serum albumin (HSA) (i.e., Hb@ZIF-8/PLL/HSA<sub>XL</sub> and Hb@ZIF-8/PLL<sub>XL</sub>/HSA<sub>XL</sub> NPs), where the subscript ‘XL’ indicates the crosslinking with glutaraldehyde, and polyethylene glycol-coated Hb@ZIF-8 NPs (Hb@ZIF-8/PEG NPs). Prior the measurement, the NPs were resuspended in 10 mM HEPES pH 7.4 150 mM NaCl and diluted 10× in MQ.

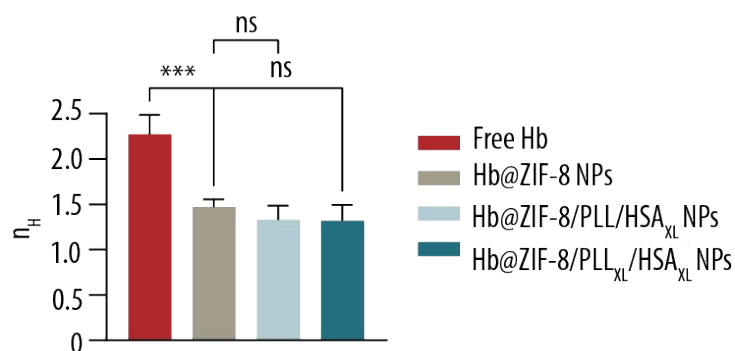

**Figure S7.** Hill coefficient ( $n_H$ ) values of free Hb, bare Hb-loaded ZIF-8 NPs (Hb@ZIF-8 NPs) and poly-L-lysine (PLL)- and human serum albumin (HSA)-coated Hb@ZIF-8 NPs, denoted as Hb@ZIF-8/PLL/HSA<sub>XL</sub> and Hb@ZIF-8/PLL<sub>XL</sub>/HSA<sub>XL</sub> NPs, where the subscript ‘XL’ indicates glutaraldehyde crosslinking following PLL and/or HSA deposition. Statistical significance: ns = not significant; \*\*\* $p < 0.001$ .
